# Supplementary material
Source: PubMed Central journal article supplement (PMC5591773)
Supplement: NIHMS880027-supplement-supplement_1.pdf [file NIHMS880027-supplement-supplement_1.pdf]

221.

**Figure 1: An example from one patient of the absolute T2\* time curves for tumor (solid), NAWM (dash dash), and the AIF (dash dot) ROI. As described in Eq. 6, the optimal TE is proportional to the weighted average of absolute T2\* values during the first pass (as indicated by the shaded gray area) of the contrast agent.**

**Figure 2: Boxplot representation of baseline and minimum T2\* values (white boxplots) along with their respective calculated optimal TE (gray boxplots) in the brain tumor, NAWM, and AIF. Baseline T2\* is defined as the T2\* of the ROI before contrast arrival and minimum T2\* is defined as the T2\* value at the peak signal drop. Solid lines represent median values whereas solid dots represent means across subjects in these boxplots.**

**Supplementary Figure 1: An illustration of the ROI selection process for the tumor and NAWM ROIs as outlined within the Materials and Methods section.**

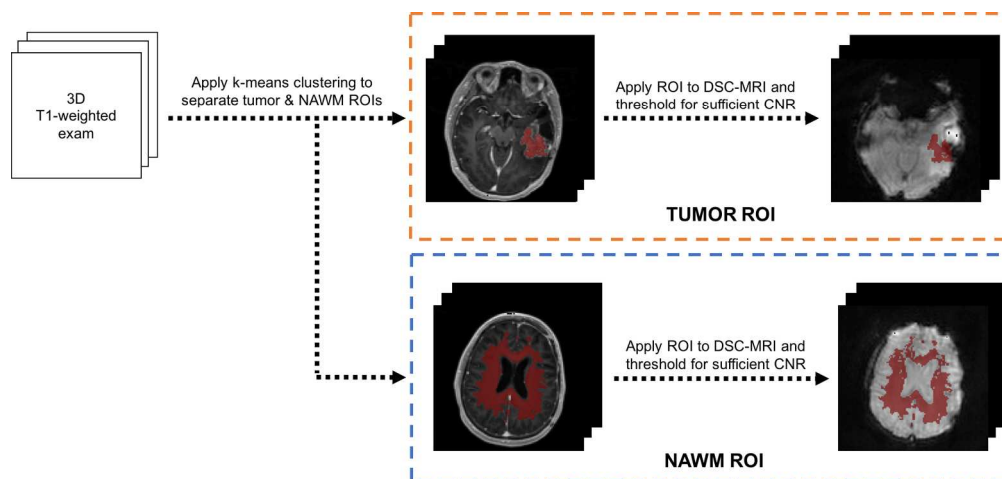

Supplementary Figure 1: An illustration of the ROI selection process for the tumor and NAWM ROIs as outlined within the Materials and Methods section.

334x157mm (150 x 150 DPI)
